# Supplementary material for: Syntheses, crystal structures and magnetic properties of a series of μ-phenoxo-μ1,1-carboxylato-μ1,3-carboxylato trinickel(ii) compounds
Source: Royal Society of Chemistry journal article supplement (doi:10.1039/c4dt00862f), 2014-06-18
Supplement: c4dt00862f1.pdf [file c4dt00862f1.pdf]

## Electronic Supplementary Information

For

**Syntheses, crystal structures and magnetic properties of a series of  $\mu$ -phenoxo- $\mu_{1,1}$ -carboxylato- $\mu_{1,3}$ -carboxylato trinickel(II) compounds**

**Sagarika Bhattacharya, Sujit Sasmal, Luca Carrella, Eva Rentschler\* and Sasankasekhar Mohanta\***

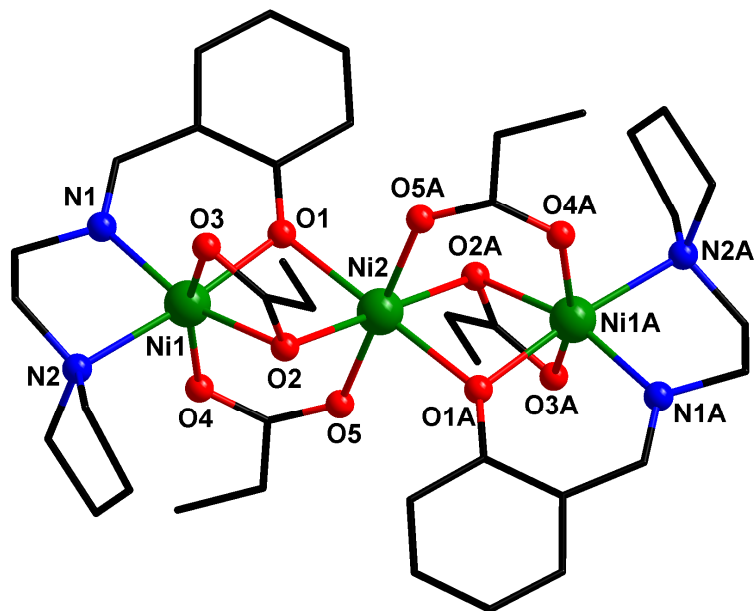

**Fig. S1** Crystal structure of  $[\text{Ni}_3^{\text{II}}(\text{L}^{\text{sal-pyr}})_2(\text{Propionate})_4]$  (**1**). All the hydrogen atoms are omitted for clarity. Symmetry code: A,  $1 - x, - y, - z$ .

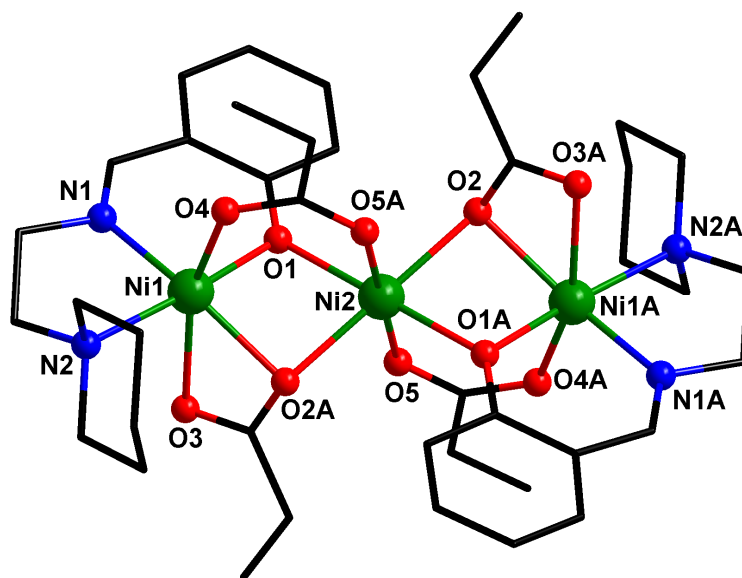

**Fig. S2** Crystal structure of  $[\text{Ni}_3^{\text{II}}(\text{L}^{\text{sal-pip}})_2(\text{Propionate})_4]$  (**4**). All the hydrogen atoms are omitted for clarity. Symmetry code: A,  $1 - x, 2 - y, 2 - z$ .

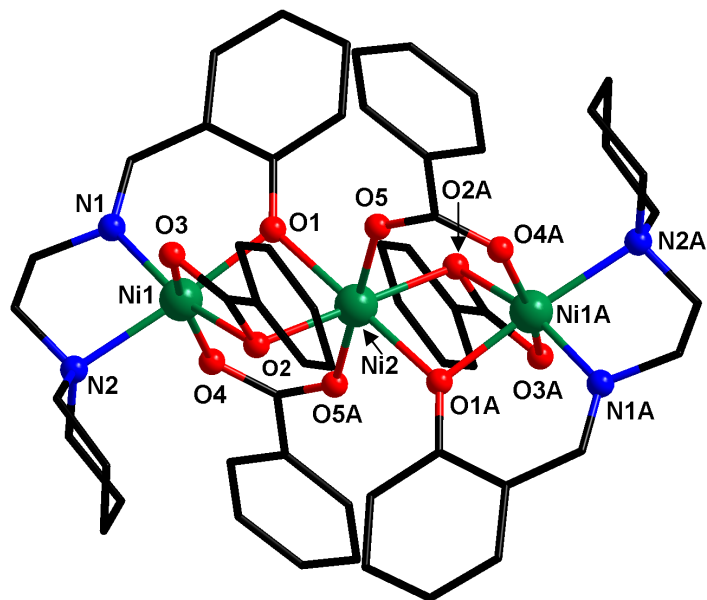

**Fig. S3** Crystal structure of  $[\text{Ni}^{\text{II}}_3(\text{L}^{\text{sal-pip}})_2(\text{Benzoate})_4] \cdot \text{CH}_2\text{Cl}_2$  (**5**). All the hydrogen atoms and a dichloromethane molecule (solvent of crystallization) are omitted for clarity. Symmetry code: A,  $0.5 - x, 0.5 - y, 1 - z$ .

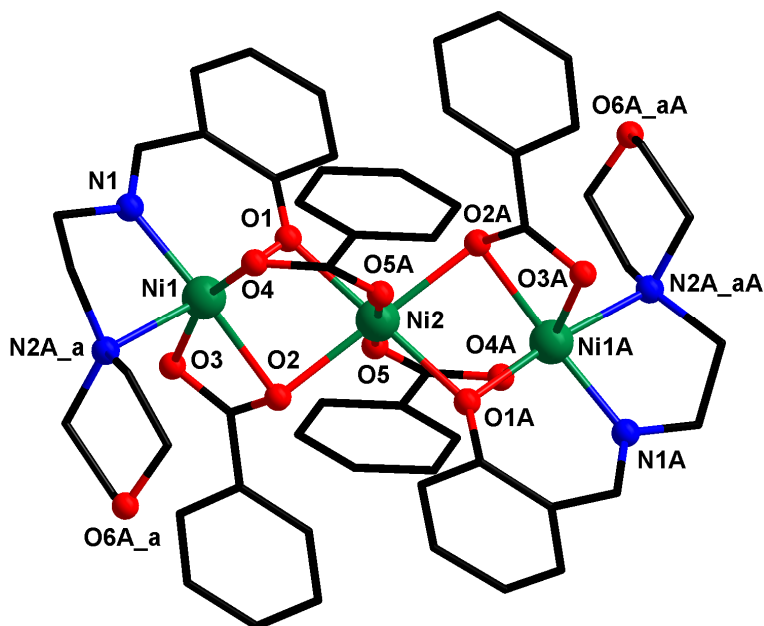

**Fig. S4** Crystal structure of  $[\text{Ni}^{\text{II}}_3(\text{L}^{\text{sal-mor}})_2(\text{Benzoate})_4] \cdot 3\text{CH}_2\text{Cl}_2$  (**7**). Three dichloromethane molecule (solvents of crystallization) and all the hydrogen atoms are omitted for clarity. Symmetry code: A,  $1 - x, 2 - y, 1 - z$ .

**Table S1** Selected bond lengths (Å) and bond angles (°) in the coordination environments of the metal centers in Compound **2**. Symmetry codes A (for Unit-I):  $1 - x, 1 - y, -z$ ; B (for Unit-II):  $-x, 1 - y, 1 - z$

|                  | <b>2</b> (Unit-I) |                  | <b>2</b> (Unit-II) |
|------------------|-------------------|------------------|--------------------|
| Ni1–O1           | 2.007(6)          | Ni3–O6           | 2.005(5)           |
| Ni1–O2           | 2.148(6)          | Ni3–O7           | 2.146(5)           |
| Ni1–N1           | 1.992(8)          | Ni3–N3           | 1.998(8)           |
| Ni1–N2           | 2.157(9)          | Ni3–N4           | 2.184(8)           |
| Ni1–O3           | 2.183(6)          | Ni3–O8           | 2.182(6)           |
| Ni1–O4           | 2.020(6)          | Ni3–O9           | 2.024(5)           |
| Ni2–O1           | 2.114(6)          | Ni4–O6           | 2.071(5)           |
| Ni2–O1A          | 2.114(6)          | Ni4–O6B          | 2.071(5)           |
| Ni2–O2           | 2.125(6)          | Ni4–O7           | 2.136(5)           |
| Ni2–O2A          | 2.125(6)          | Ni4–O7B          | 2.136(5)           |
| Ni2–O5           | 1.997(6)          | Ni4–O10          | 1.983(5)           |
| Ni2–O5A          | 1.997(6)          | Ni4–O10B         | 1.983(5)           |
| Ni1···Ni2        | 3.051             | Ni3···Ni4        | 3.066              |
| N1–Ni1–O2        | 164.3(3)          | N3–Ni3–O7        | 157.2(3)           |
| N2–Ni1–O1        | 171.6(3)          | N4–Ni3–O6        | 175.2(3)           |
| O3–Ni1–O4        | 157.0(2)          | O8–Ni3–O9        | 159.4(2)           |
| N1–Ni1–N2        | 82.8(4)           | N3–Ni3–N4        | 83.9(4)            |
| N1–Ni1–O1        | 88.9(3)           | N3–Ni3–O6        | 91.5(3)            |
| N1–Ni1–O3        | 105.7(3)          | N3–Ni3–O8        | 98.1(3)            |
| N1–Ni1–O4        | 97.0(3)           | N3–Ni3–O9        | 102.4(3)           |
| N2–Ni1–O2        | 104.8(3)          | N4–Ni3–O7        | 103.8(3)           |
| N2–Ni1–O3        | 91.1(3)           | N4–Ni3–O8        | 90.9(3)            |
| N2–Ni1–O4        | 88.3(3)           | N4–Ni3–O9        | 89.3(3)            |
| O1–Ni1–O2        | 83.4(2)           | O6–Ni3–O7        | 81.0(2)            |
| O1–Ni1–O3        | 91.4(2)           | O6–Ni3–O8        | 91.0(2)            |
| O1–Ni1–O4        | 92.5(2)           | O6–Ni3–O9        | 90.5(2)            |
| O2–Ni1–O3        | 61.0(2)           | O7–Ni3–O8        | 60.8(2)            |
| O2–Ni1–O4        | 97.0(2)           | O7–Ni3–O9        | 99.2(2)            |
| O1–Ni2–O1A       | 179.999(1)        | O6–Ni4–O6B       | 179.999(1)         |
| O2–Ni2–O2A       | 179.998(1)        | O7–Ni4–O7B       | 180.0              |
| O5–Ni2–O5A       | 179.998(1)        | O10–Ni4–O10B     | 179.999(1)         |
| O1–Ni2–O2        | 81.5(2)           | O6–Ni4–O7        | 79.8(2)            |
| O1–Ni2–O2A       | 98.5(2)           | O6–Ni4–O7B       | 100.2(2)           |
| O1–Ni2–O5        | 90.1(2)           | O6–Ni4–O10       | 92.3(2)            |
| O1–Ni2–O5A       | 89.9(2)           | O6–Ni4–O10B      | 87.7(2)            |
| O2–Ni2–O5        | 89.9(2)           | O7–Ni4–O10       | 89.4(2)            |
| O2–Ni2–O5A       | 90.1(2)           | O7B–Ni4–O10      | 90.6(2)            |
| Ni1–O1–Ni2       | 95.5(3)           | Ni3–O6–Ni4       | 97.6(2)            |
| Ni1–O2–Ni2       | 91.1(2)           | Ni3–O7–Ni4       | 91.45              |
| Ni1···Ni2···Ni1A | 180.00            | Ni3···Ni4···Ni3B | 180.00             |

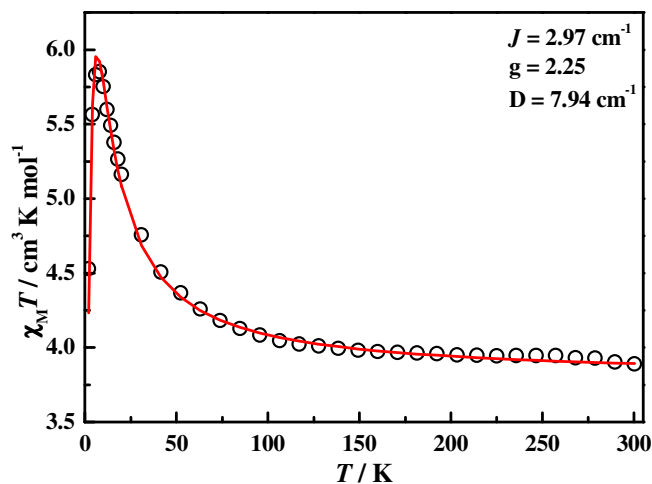

**Fig. S5** Fittings of the  $\chi_M T$  vs  $T$  of  $[\text{Ni}^{\text{II}}_3(\text{L}^{\text{sal-pyr}})_2(\text{Benzoate})_4] \cdot \text{CH}_3\text{CN}$  (**2**) between 2.0 and 300.0 K. The experimental data is shown as black circles and the red line corresponds to the theoretical values.

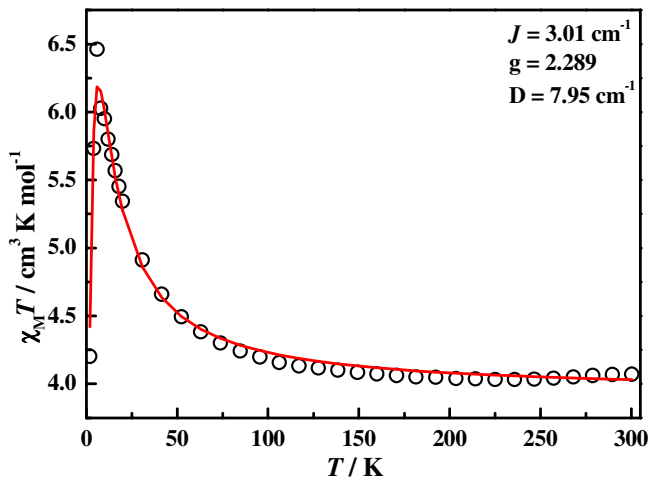

**Fig. S6** Fittings of the  $\chi_M T$  vs  $T$  of  $[\text{Ni}^{\text{II}}_3(\text{L}^{\text{sal-pip}})_2(\text{Acetate})_4] \cdot 2\text{CH}_3\text{CN}$  (**3**) between 2.0 and 300.0 K. The experimental data is shown as black circles and the red line corresponds to the theoretical values.

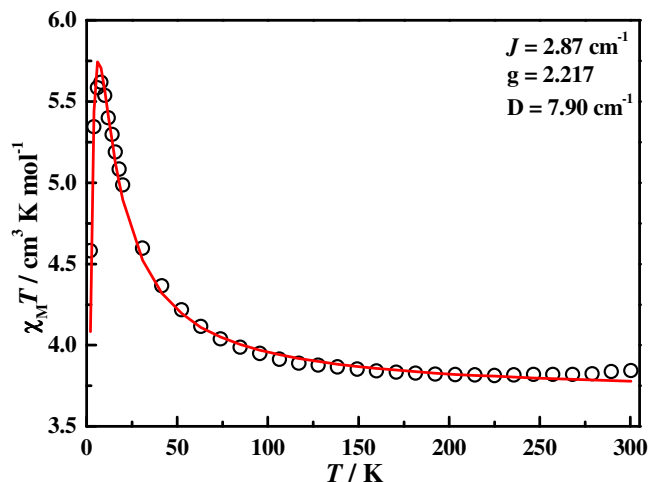

**Fig. S7** Fittings of the  $\chi_M T$  vs  $T$  of  $[\text{Ni}^{\text{II}}_3(\text{L}^{\text{sal-pip}})_2(\text{Propionate})_4]$  (**4**) between 2.0 and 300.0 K. The experimental data is shown as black circles and the red line corresponds to the theoretical values.

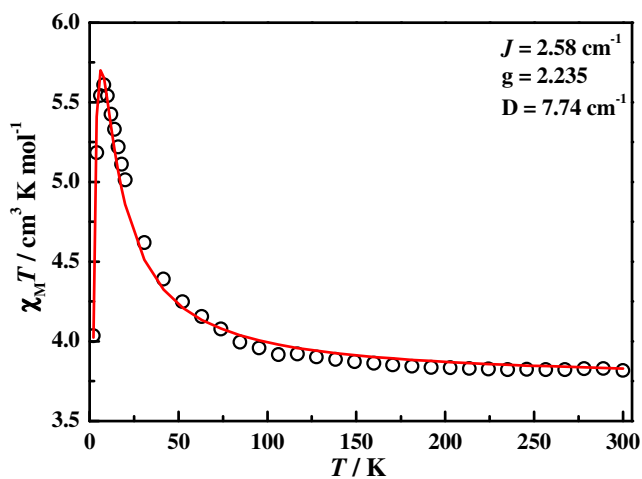

**Fig. S8** Fittings of the  $\chi_M T$  vs  $T$  of  $[\text{Ni}^{\text{II}}_3(\text{L}^{\text{sal-pip}})_2(\text{Benzoate})_4] \cdot \text{CH}_2\text{Cl}_2$  (**5**) between 2.0 and 300.0 K. The experimental data is shown as black circles and the red line corresponds to the theoretical values.

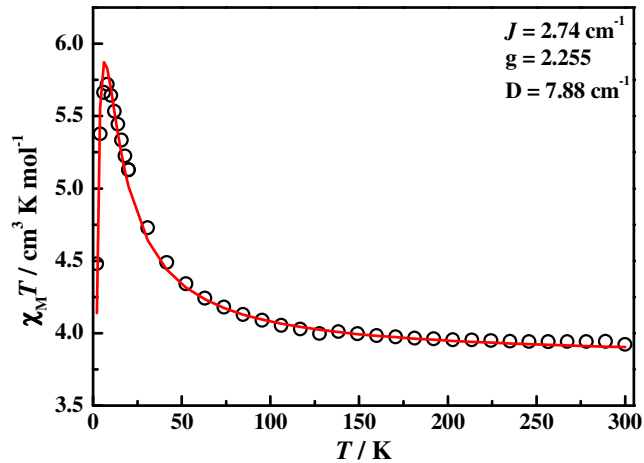

**Fig. S9** Fittings of the  $\chi_M T$  vs  $T$  of  $[\text{Ni}^{\text{II}}_3(\text{L}^{\text{sal-mor}})_2(\text{Propionate})_4]$  (**6**) between 2.0 and 300.0 K. The experimental data is shown as black circles and the red line corresponds to the theoretical values.

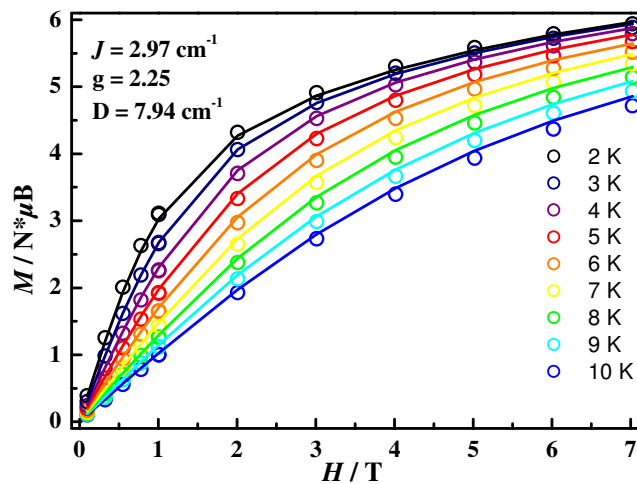

**Fig. S10** The low-temperature magnetization of  $[\text{Ni}^{\text{II}}_3(\text{L}^{\text{sal-pyr}})_2(\text{Benzoate})_4] \cdot \text{CH}_3\text{CN}$  (**2**) obtained at the indicated applied dc fields. The symbols are experimental data, while the solid lines represent the calculated curves listed in the inset.

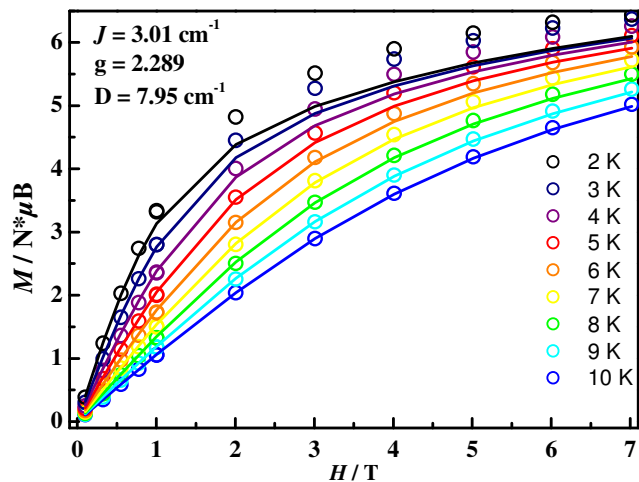

**Fig. S11** The low-temperature magnetization of  $[\text{Ni}^{\text{II}}_3(\text{L}^{\text{sal-pip}})_2(\text{Acetate})_4] \cdot 2\text{CH}_3\text{CN}$  (3) obtained at the indicated applied dc fields. The symbols are experimental data, while the solid lines represent the calculated curves listed in the inset.

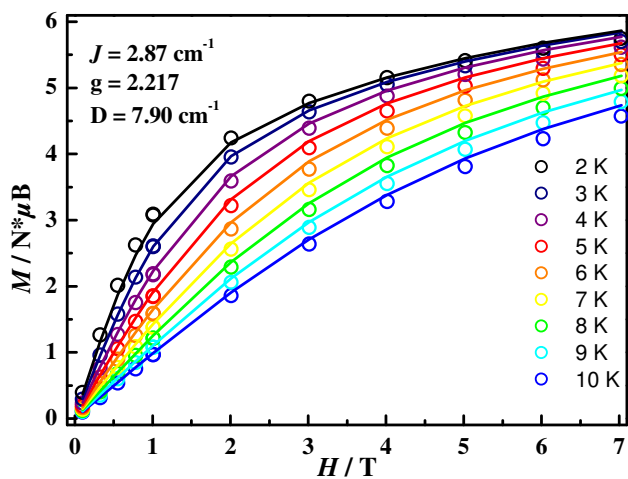

**Fig. S12** The low-temperature magnetization of  $[\text{Ni}^{\text{II}}_3(\text{L}^{\text{sal-pip}})_2(\text{Propionate})_4]$  (4) obtained at the indicated applied dc fields. The symbols are experimental data, while the solid lines represent the calculated curves listed in the inset.



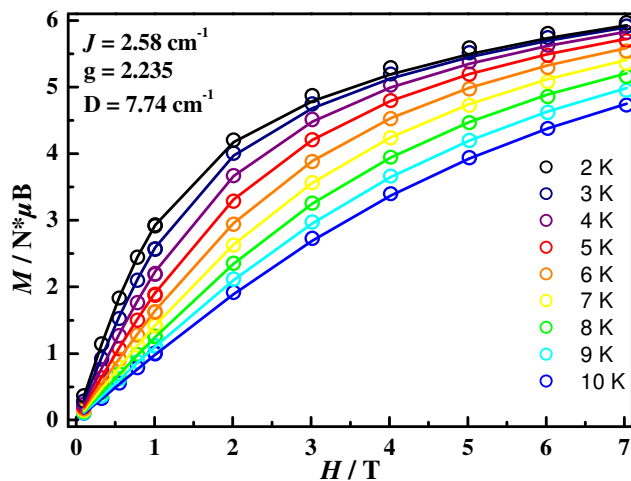

**Fig. S13** The low-temperature magnetization of  $[\text{Ni}^{\text{II}}_3(\text{L}^{\text{sal-pip}})_2(\text{Benzoate})_4] \cdot \text{CH}_2\text{Cl}_2$  (5) obtained at the indicated applied dc fields. The symbols are experimental data, while the solid lines represent the calculated curves listed in the inset.

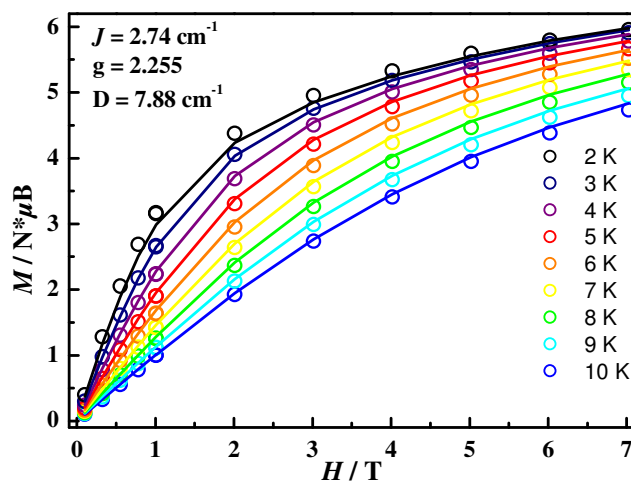

**Fig. S14** The low-temperature magnetization of  $[\text{Ni}^{\text{II}}_3(\text{L}^{\text{sal-mor}})_2(\text{Propionate})_4]$  (6) obtained at the indicated applied dc fields. The symbols are experimental data, while the solid lines represent the calculated curves listed in the inset.
